# Supplementary material for: Label-free electrochemiluminescence detection of specific-sequence DNA based on DNA probes capped ion nanochannels
Source: Royal Society of Chemistry journal article supplement (doi:10.1039/c3an02187d), 2013-12-16
Supplement: c3an02187d.pdf [file c3an02187d.pdf]

## Supporting Information

### Label-free Electrochemiluminescence Detection of Specific-Sequence DNA Based on DNA probes Capped ion Nanochannels

Haitao Xiong, Xingwang Zheng<sup>\*1</sup>

(Key Laboratory of Analytical Chemistry for Life Science of Shaanxi Province,  
School of Chemistry and Chemical Engineering, Shaanxi Normal University,  
Xi'an 710062, P.R China)

Tab. S1 DNA probe and target DNA sequence

| Name | sequence                |
|------|-------------------------|
| P    | 5'- GTTCATGCCGCCCAT -3' |
| T1   | 5'-ATGGGCGGCATGAAC-3'   |
| T2   | 5'-ATG□GCGGCATGAAC-3'   |
| T3   | 5'-CCCATTGCAGATCCG-3'□  |

Tab. S2 Selection of chitosan volume

| chitosan volume<br>(μL, wt: 0.5%) | 0   | 50  | 100 | 300 | 500 | 1000 |
|-----------------------------------|-----|-----|-----|-----|-----|------|
| ECL signal to noise rate          | 1.2 | 1.4 | 1.7 | 2.0 | 1.2 | 1.1  |

Corresponding author. Fax: +86 29 81530727.

E-mail addresses: zhengxw@snnu.edu.cn

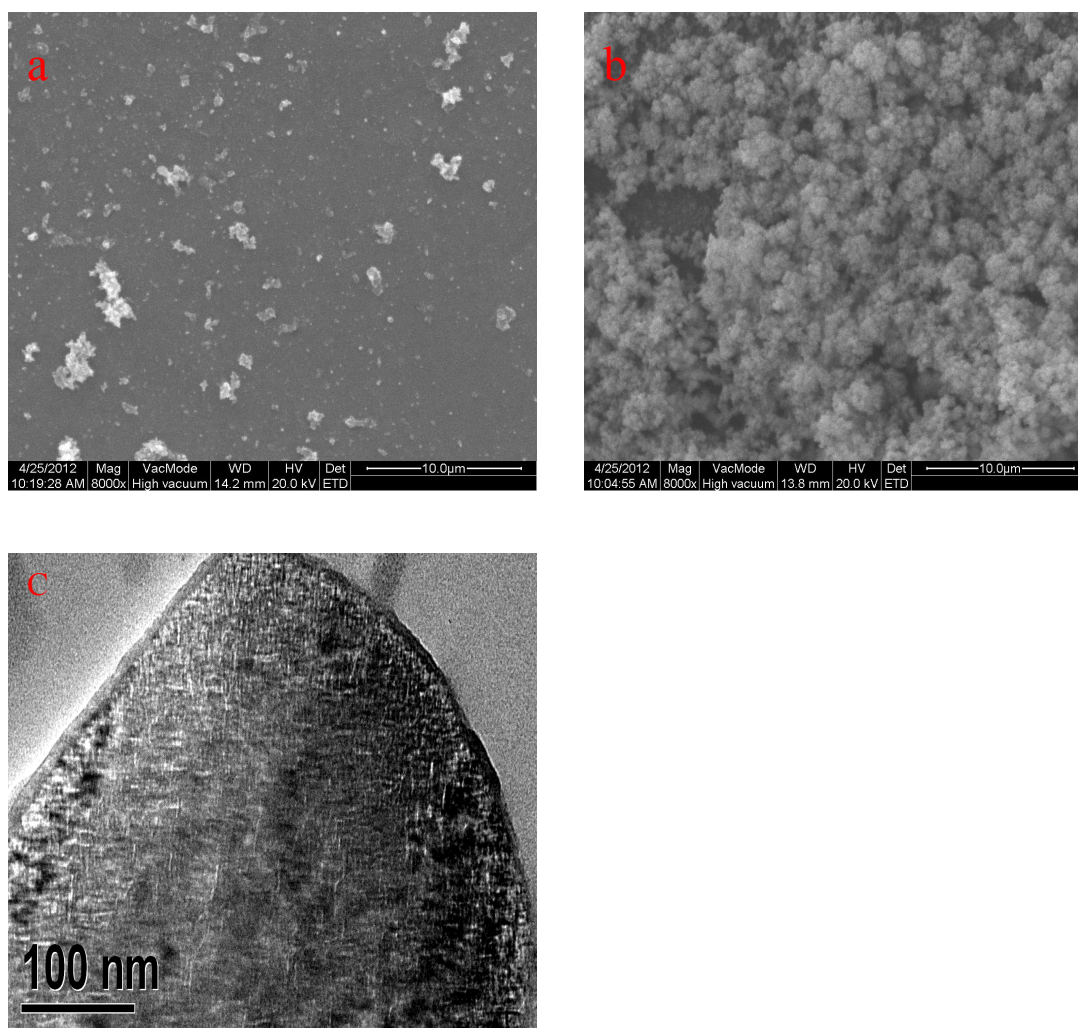

Fig.S1 SEM and TEM of Silica-  $\text{Ru}(\text{bpy})_3^{2+}$  film Electrodeposited on a Graphite electrode  
(a. SEM in the absence of Chitosan; b. SEM in the presence of Chitosan;  
c. TEM in the presence of Chitosan;)

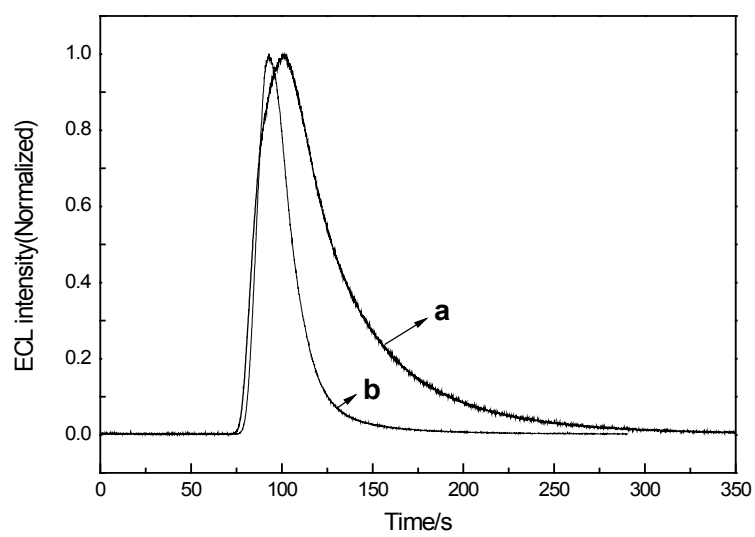

Fig. S2 ECL kinetic process of two different electrodes (a. not composited Chitosan;  
b. composited Chitosan) in  $1.0 \times 10^{-6} \text{ mol} \cdot \text{L}^{-1}$  oxalate solution
